# Supplementary material for: Impact of metal coordination and pH on the antimicrobial activity of histatin 5 and the products of its hydrolysis
Source: Royal Society of Chemistry journal article supplement (doi:10.1039/d4dt00565a), 2024-01-01
Supplement: d4dt00565a1.pdf [file d4dt00565a1.pdf]

## Impact on metal coordination and pH on the antimicrobial activity of histatin 5 and the products of its hydrolysis

Emilia Dzień,<sup>a</sup> Joanna Wąty,<sup>\*a</sup> Arian Kola,<sup>b</sup> Aleksandra Mikołajczyk,<sup>c</sup> Adriana Miller,<sup>a</sup> Agnieszka Matera-Witkiewicz,<sup>c</sup> Daniela Valensin<sup>b</sup> and Magdalena Rowińska-Żyrek<sup>\*a</sup>

<sup>a</sup> Faculty of Chemistry, University of Wrocław, F. Joliot-Curie 14, 50-383 Wrocław, Poland

<sup>b</sup> Department of Biotechnology, Chemistry and Pharmacy, University of Siena, Via A. Moro 2, 53100 Siena, Italy

<sup>c</sup> Screening of Biological Activity Assays and Collection of Biological Material Laboratory, Wrocław Medical University Biobank, Faculty of Pharmacy, Wrocław Medical University, Borowska 211A, 50-556 Wrocław, Poland

Table S1. Potentiometric data for proton, Zn(II) and Cu(II) complexes with histatin 5, histatin 5-8 and histatin 8 at T = 298 K and I = 0.1 M NaClO<sub>4</sub>. The standard deviations are reported in parentheses as uncertainties on the last significant figure.

| species                 | Histatin 5<br>(DSHAKRRHHGYKRRKFHEKHHSHRGY) |                        | Histatin 5-8<br>(DSHAKRRHHGYKR) |                        | Histatin 8<br>(KFHEKHHSHRGY) |                        |
|-------------------------|--------------------------------------------|------------------------|---------------------------------|------------------------|------------------------------|------------------------|
|                         | logβ <sup>a</sup>                          | pKa <sup>b</sup>       | logβ <sup>a</sup>               | pKa <sup>b</sup>       | logβ <sup>a</sup>            | pKa <sup>b</sup>       |
| H <sub>16</sub> L       | 121.11(1)                                  | 2.63(D)                |                                 |                        |                              |                        |
| H <sub>15</sub> L       | 118.48(1)                                  | 3.64(E)                |                                 |                        |                              |                        |
| H <sub>14</sub> L       | 114.84(1)                                  | 5.14(H)                |                                 |                        |                              |                        |
| H <sub>13</sub> L       | 109.70(1)                                  | 5.60(H)                |                                 |                        |                              |                        |
| H <sub>12</sub> L       | 104.10(2)                                  | 5.98(H)                |                                 |                        |                              |                        |
| H <sub>11</sub> L       | 98.12(2)                                   | 6.16(H)                |                                 |                        |                              |                        |
| H <sub>10</sub> L       | 91.96(2)                                   | 6.67(H)                |                                 |                        |                              |                        |
| H <sub>9</sub> L        | 85.29(1)                                   | 6.81(H)                |                                 |                        | 70.16(1)                     | 3.53(E)                |
| H <sub>8</sub> L        | 78.48(1)                                   | 7.72(H)                | 62.98(2)                        | 2.79(D)                | 66.63(1)                     | 5.47(H)                |
| H <sub>7</sub> L        | 70.76(1)                                   | 9.24(NH <sub>2</sub> ) | 60.19(2)                        | 5.56(H)                | 61.16(1)                     | 6.13(H)                |
| H <sub>6</sub> L        | 61.52(2)                                   | 9.38(Y)                | 54.63(1)                        | 6.34(H)                | 55.03(1)                     | 6.60(H)                |
| H <sub>5</sub> L        | 52.14(1)                                   | 9.91(Y)                | 48.29(2)                        | 7.27(H)                | 48.43(1)                     | 7.37(H)                |
| H <sub>4</sub> L        | 42.23(3)                                   | 10.21(K)               | 41.02(1)                        | 9.42(NH <sub>2</sub> ) | 41.06(1)                     | 9.43(NH <sub>2</sub> ) |
| H <sub>3</sub> L        | 32.02(1)                                   | 10.22(K)               | 31.60(2)                        | 9.81(Y)                | 31.63(1)                     | 9.88(Y)                |
| H <sub>2</sub> L        | 21.80(2)                                   | -                      | 21.79(1)                        | 10.77(K)               | 21.75(1)                     | 10.68(K)               |
| HL                      |                                            | -                      | 11.02(2)                        | 11.02(K)               | 11.07(1)                     | 11.07(K)               |
| <b>Cu(II) complexes</b> |                                            |                        |                                 |                        |                              |                        |
| CuH <sub>11</sub> L     | 105.64(1)                                  | -                      | -                               | -                      | -                            | -                      |
| CuH <sub>10</sub> L     | 100.62(3)                                  | 5.02                   | -                               | -                      | -                            | -                      |
| CuH <sub>9</sub> L      | 94.86(7)                                   | 5.76                   | -                               | -                      | -                            | -                      |
| CuH <sub>8</sub> L      | 89.06(5)                                   | 5.80                   | -                               | -                      | -                            | -                      |
| CuH <sub>7</sub> L      | 82.63(7)                                   | 6.43                   | -                               | -                      | -                            | -                      |
| CuH <sub>6</sub> L      | 76.07(4)                                   | 6.56                   | -                               | -                      | -                            | -                      |
| CuH <sub>5</sub> L      | 68.86(3)                                   | 7.21                   | -                               | -                      | 57.66(2)                     | -                      |
| CuH <sub>4</sub> L      | 59.77(6)                                   | 9.09                   | 50.76(1)                        | -                      | 52.89(3)                     | 4.77                   |
| CuH <sub>3</sub> L      | 50.22(6)                                   | 9.55                   | 44.85(3)                        | 5.91                   | 46.81(5)                     | 6.08                   |
| CuH <sub>2</sub> L      | 40.26(9)                                   | 9.96                   | 38.39(3)                        | 6.46                   | 39.79(6)                     | 7.02                   |
| CuHL                    | 30.02(8)                                   | 10.24                  | 28.94(5)                        | 9.45                   | 29.87(8)                     | 9.92                   |

|                         |          |       |          |      |           |       |
|-------------------------|----------|-------|----------|------|-----------|-------|
| CuL                     | 19.65(5) | 10.37 | 19.09(3) | 9.85 | 19.83(6)  | 10.04 |
| CuH <sub>1</sub> L      | -        | -     | -        | -    | -         | -     |
| CuH <sub>2</sub> L      | -2.25(4) | -     | -2.34(4) | -    | -2.82(7)  | -     |
| <b>Zn(II) complexes</b> |          |       |          |      |           |       |
| ZnH <sub>10</sub> L     | 97.94(1) | -     | -        | -    | -         | -     |
| ZnH <sub>9</sub> L      | -        | -     | -        | -    | -         | -     |
| ZnH <sub>8</sub> L      | 86.27(1) | -     | -        | -    | -         | -     |
| ZnH <sub>7</sub> L      | 79.62(1) | 6.65  | -        | -    | -         | -     |
| ZnH <sub>6</sub> L      | 71.84(1) | 7.78  | -        | -    | -         | -     |
| ZnH <sub>5</sub> L      | 63.29(1) | 8.55  | -        | -    | 52.90(1)  | -     |
| ZnH <sub>4</sub> L      |          |       | 45.30(1) | -    | 46.52 (1) | 6.38  |
| ZnH <sub>3</sub> L      |          |       | 38.06(1) | 7.24 | 39.19(1)  | 7.33  |
| ZnH <sub>2</sub> L      |          |       | 30.15(1) | 7.91 | 30.53(2)  | 8.65  |
| ZnHL                    |          |       | 21.21(2) | 8.94 |           |       |

<sup>a</sup>  $\beta(H_jL_k) = [H_jL_k]/([H]^j[L]^k)$ , in which [L] is the concentration of the fully deprotonated peptide.

<sup>b</sup>  $\log\beta(H_jL_k) - \log\beta(H_{j-1}L_k) = pK_a$

In the Cu(II)-histatin 5 mass spectra (Fig. S1A), the prevailing signals correspond to the free ligand ( $m/z = 434.51$ ,  $z = 7+$ ;  $m/z = 506.76$ ,  $z = 6+$ ;  $m/z = 607.91$ ,  $z = 5+$  and  $m/z = 759.64$ ,  $z = 4+$ ). Signals which correspond to copper complex are also visible ( $m/z = 443.48$ ,  $z = 7+$ ;  $m/z = 517.23$ ,  $z = 6+$ ;  $m/z = 620.46$ ,  $z = 5+$  and  $m/z = 775.32$ ,  $z = 4+$ ).

In the Zn(II)-histatin 5 mass spectra (Fig. S1B), aside from the signals with come from the free ligand ( $m/z = 506.92$ ,  $z = 6+$ ;  $m/z = 608.10$ ,  $z = 5+$ ;  $m/z = 759.87$ ,  $z = 4+$ ) a zinc complexes ( $m/z = 517.40$ ,  $z = 6+$ ;  $m/z = 620.68$ ,  $z = 5+$ ;  $m/z = 775.35$ ,  $z = 4+$ ) are visible.

In the Cu(II)-histatin 5-8 mass spectra (Fig. S1C), signals which come from the free ligand ( $m/z = 497.91$ ,  $z = 3+$  and  $m/z = 746.39$ ,  $z = 2+$ ) and a copper complexes ( $m/z = 518.23$ ,  $z = 3+$  and  $m/z = 776.84$ ,  $z = 2+$ ) are visible.

In the Zn(II)-histatin 5-8 mass spectra (Fig. S1D), beside from the signals which come from the free ligand ( $m/z = 497.93$ ,  $z = 3+$  and  $m/z = 746.39$ ,  $z = 2+$ ) signals from zinc complex ( $m/z = 523.30$ ,  $z = 3+$  and  $m/z = 777.34$ ,  $z = 2+$ ) are visible.

In the case of Cu(II)-histatin 8 mass spectra (Fig. S1E), the visible signals correspond to the free ligand ( $m/z = 521.58$ ,  $z = 3+$  and  $m/z = 756.31$ ,  $z = 2+$ ) and copper complex ( $m/z = 541.88$ ,  $z = 3+$  and  $m/z = 812.30$ ,  $z = 2+$ ).

In the Zn(II)-histatin 8 spectra (Fig. S1F), aside from the signals with come from the free ligand ( $m/z = 521.59$ ,  $z = 3+$  and  $m/z = 781.89$ ,  $z = 2+$ ), a zinc complex ( $m/z = 542.23$ ,  $z = 3+$  and  $m/z = 812.85$ ,  $z = 2+$ ) and its adduct with two water molecules ( $m/z = 831.86$ ,  $z = 2+$ ) can be observed.

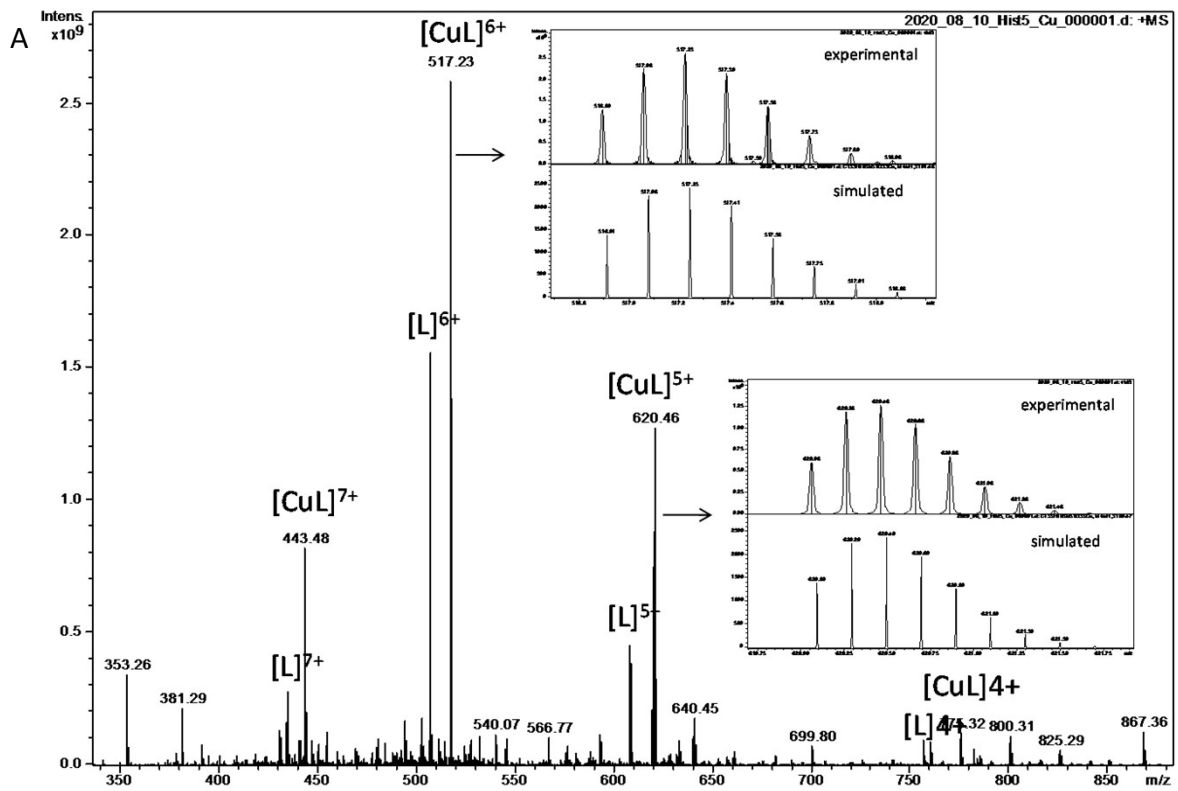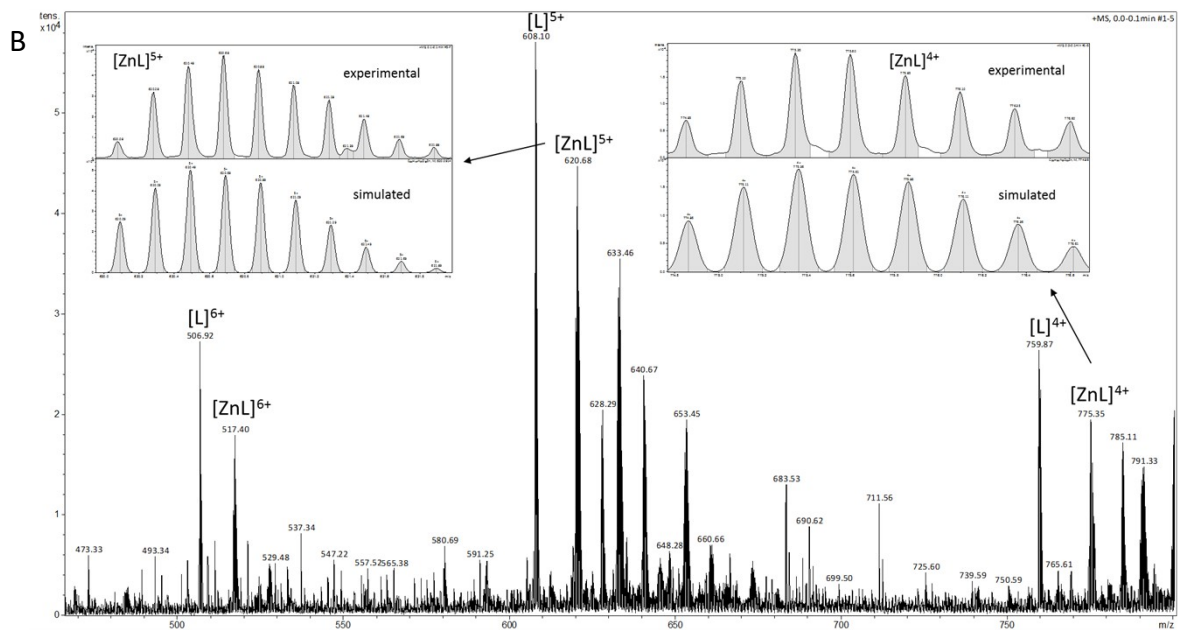

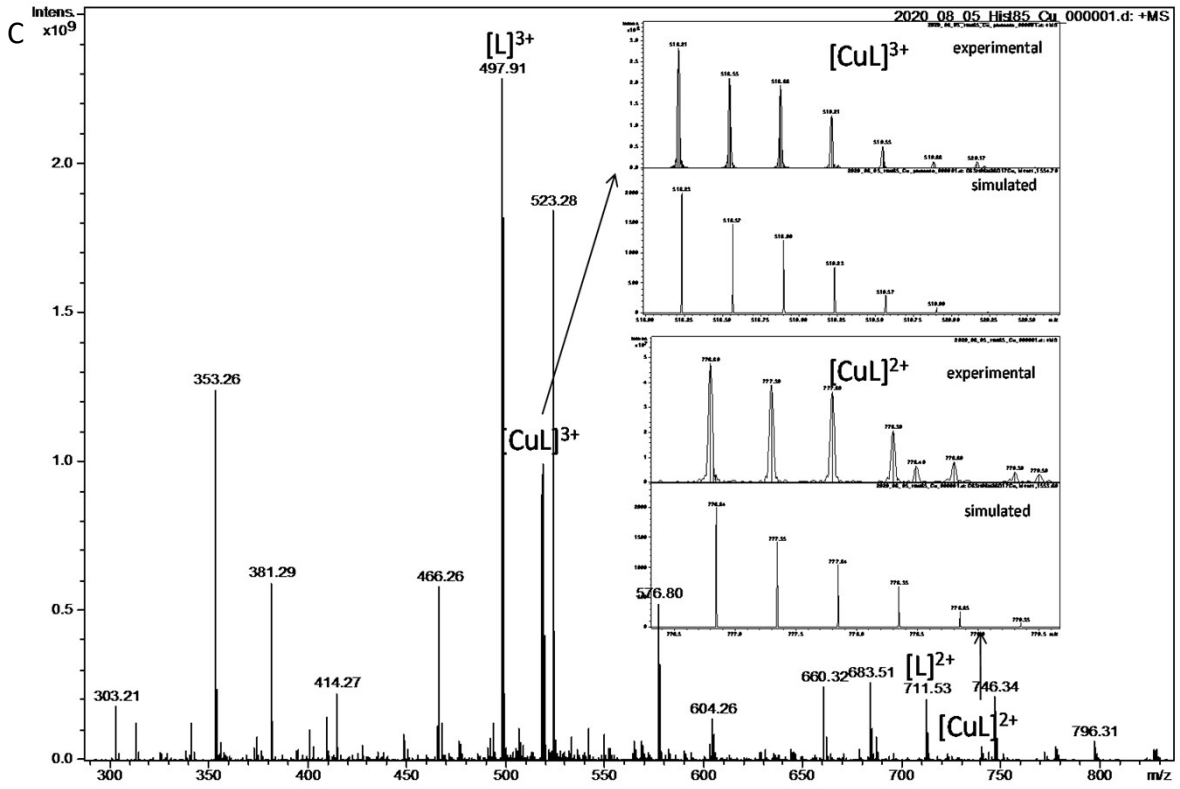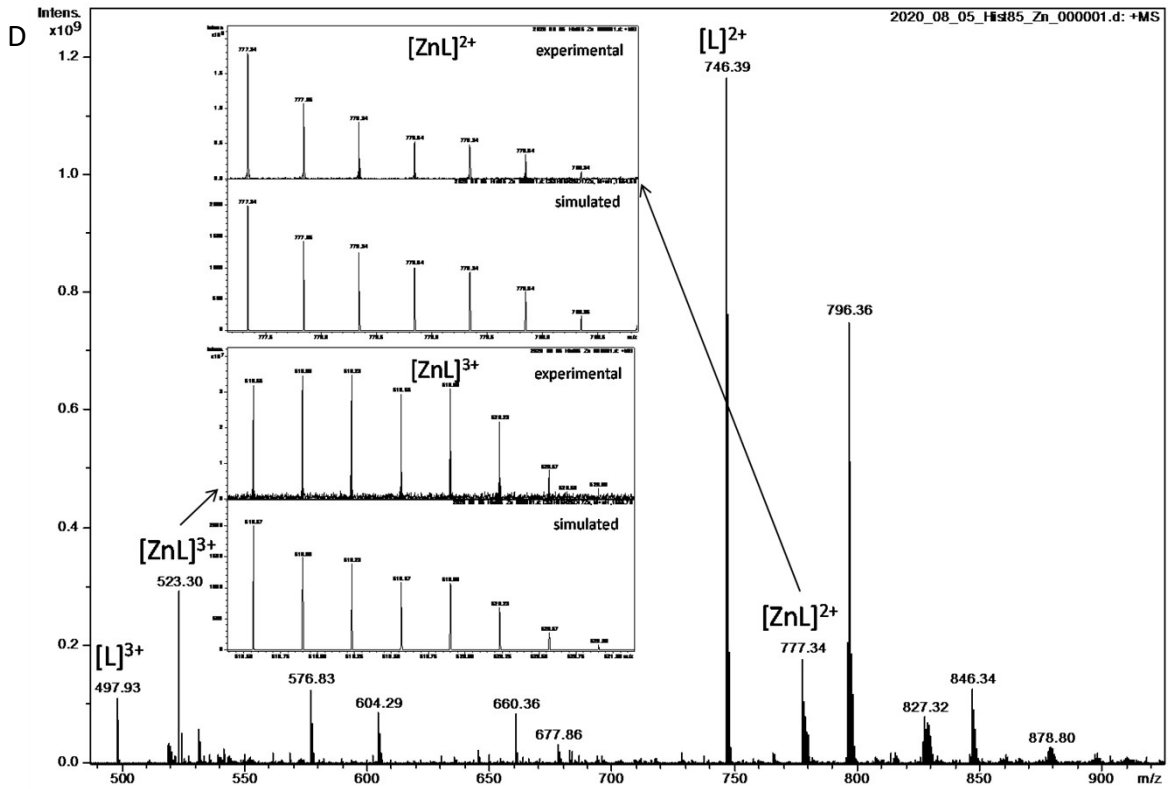

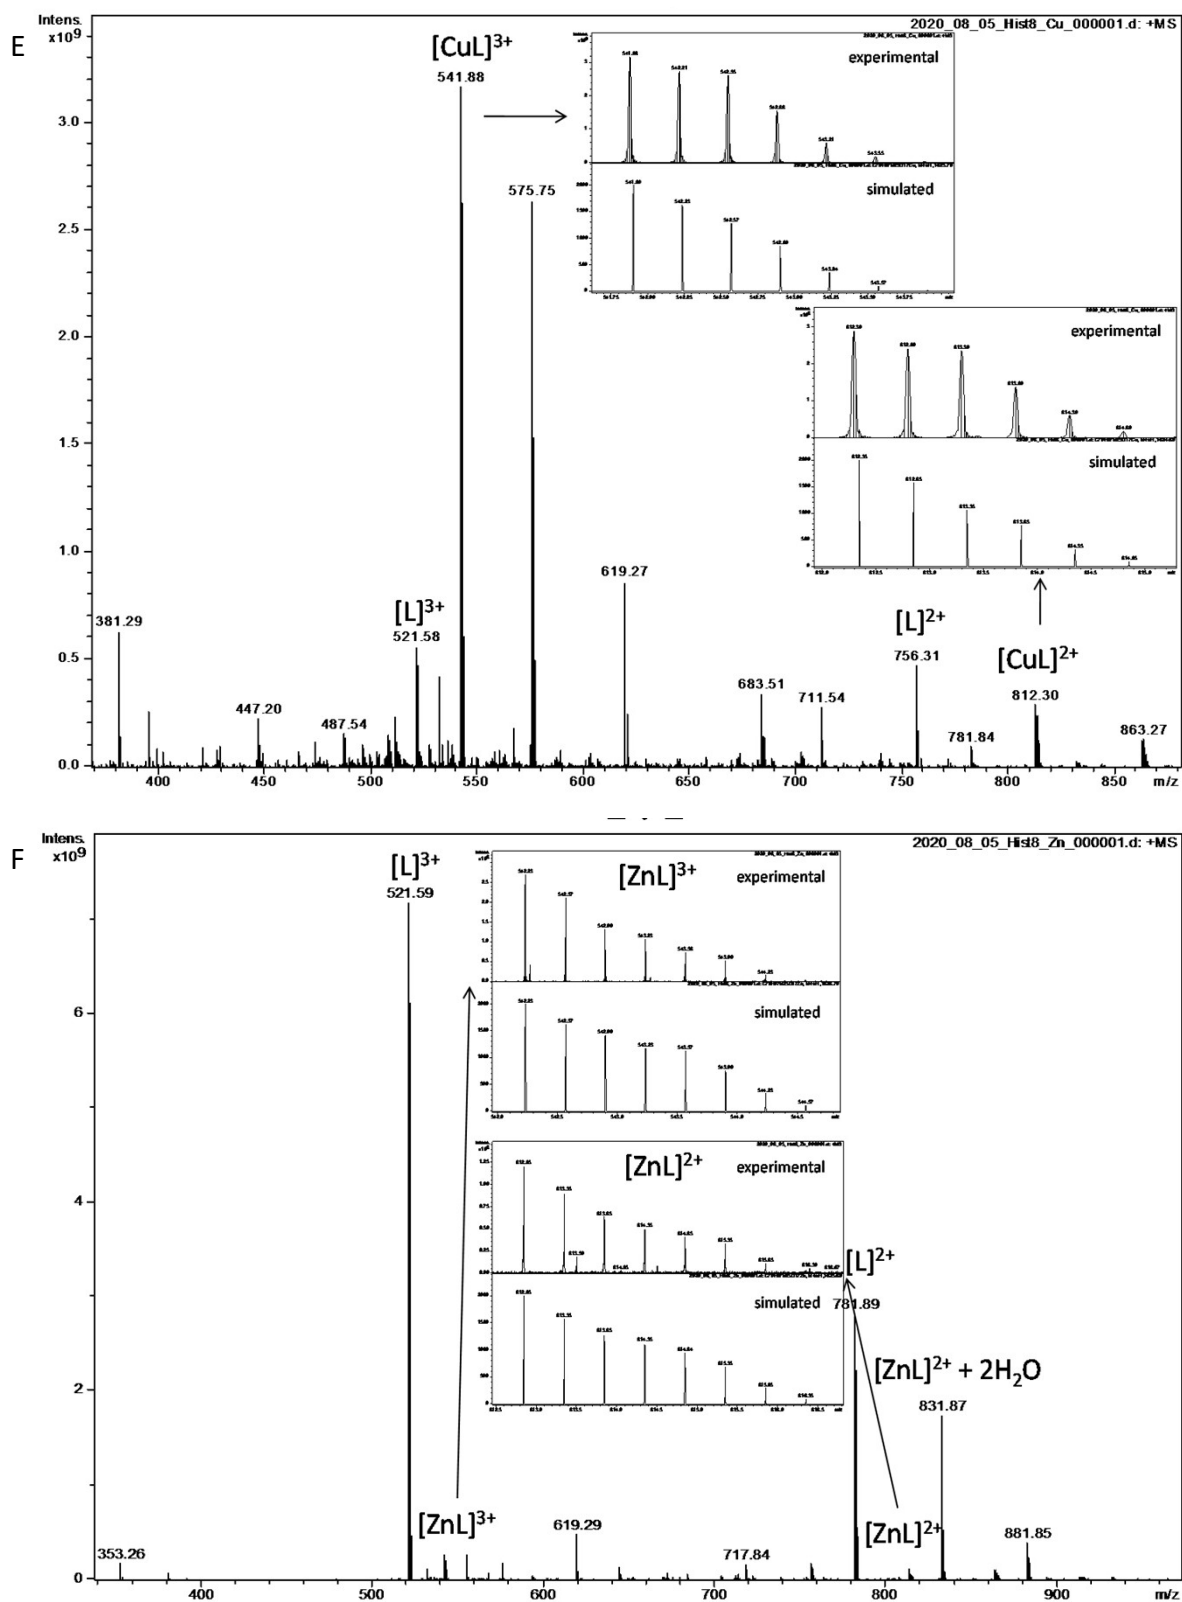

Fig. S1. ESI-MS spectra of: A) Cu(II)-histatin 3; B) Zn(II)-histatin 3; C) Cu(II)-histatin 3-4; D) Zn(II)-histatin 3-4; E) Cu(II)-histatin 4; F) Zn(II)-histatin 4; M:L molar ratio = 1:1, pH = 7.4.

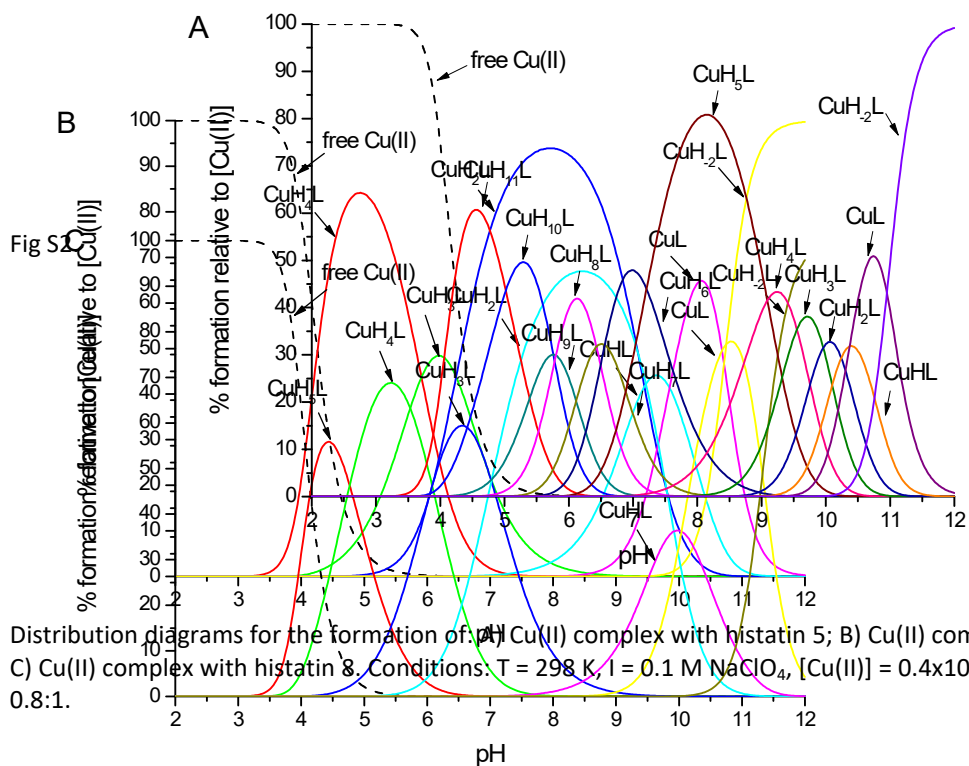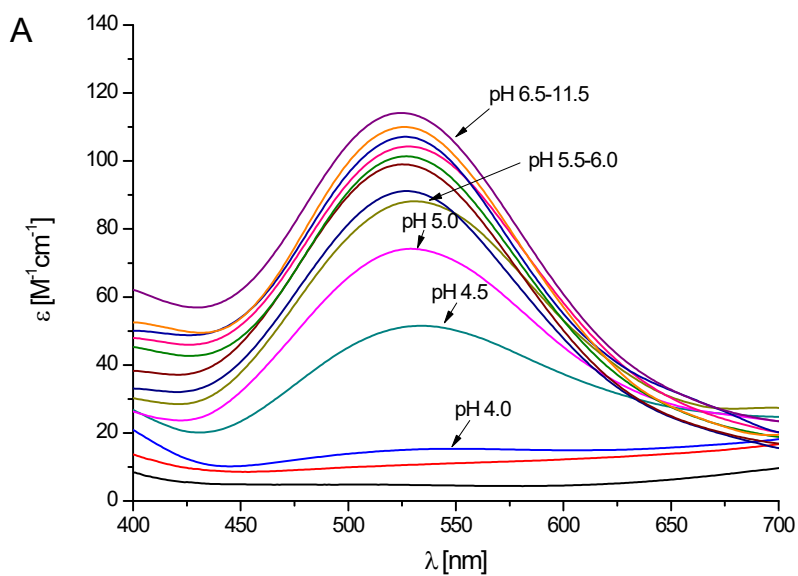

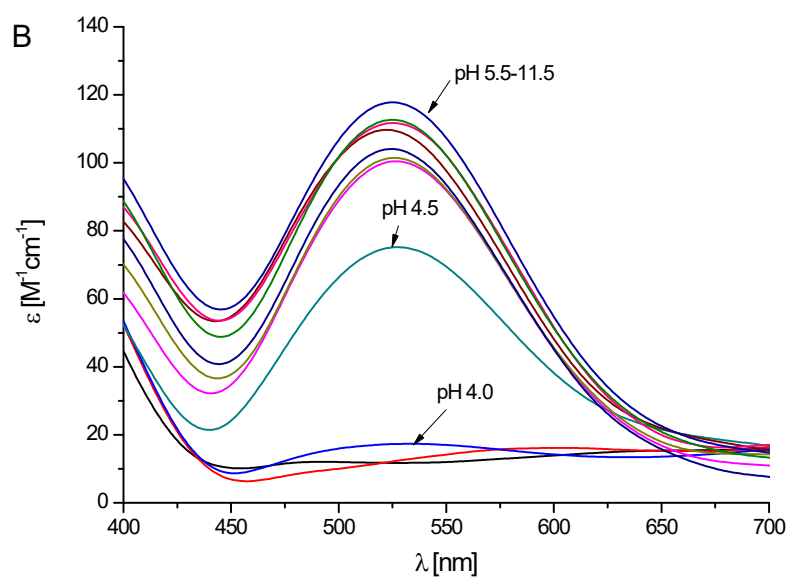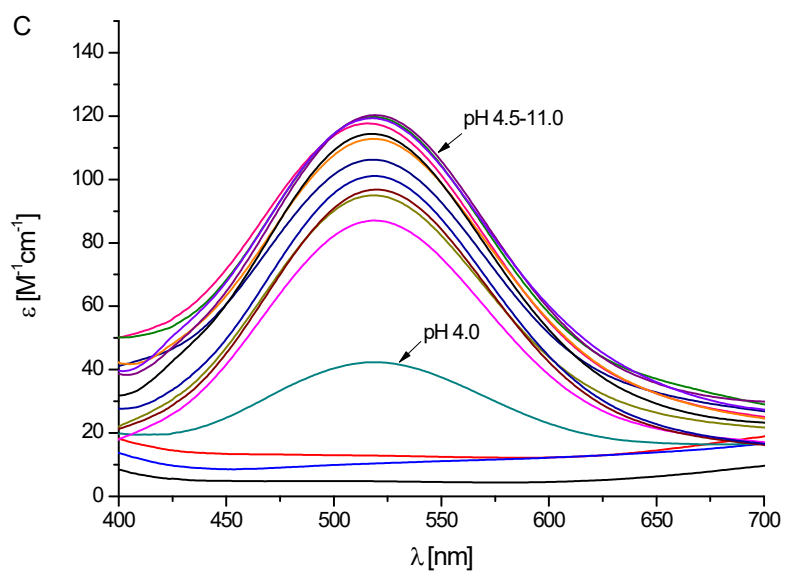

Fig. S3. UV-Vis spectra of Cu(II) complexes with: A) histatin 5; B) histatin 5-8; C) histatin 8; in pH range 2-11. Conditions:  $T = 298 \text{ K}$ ,  $I = 0.1 \text{ M NaClO}_4$ ,  $[\text{Cu(II)}] = 0.4 \cdot 10^{-3} \text{ M}$ ; M:L molar ratio = 0.8:1.

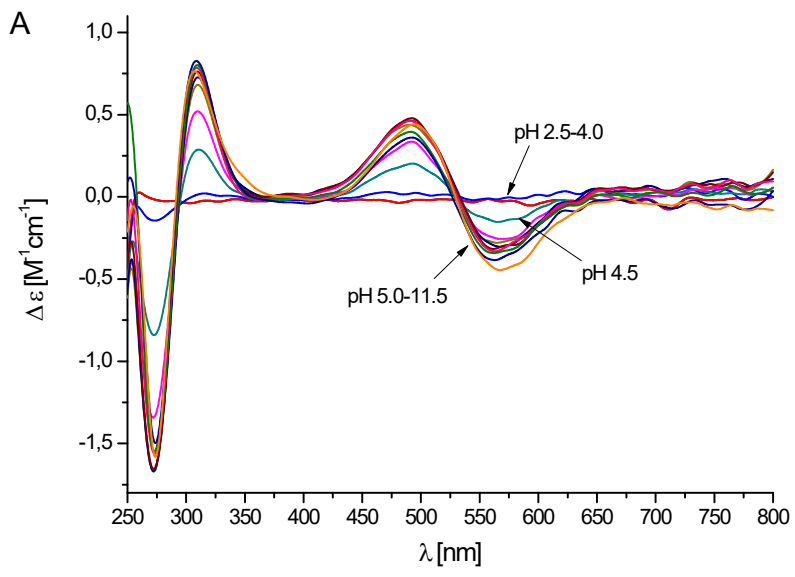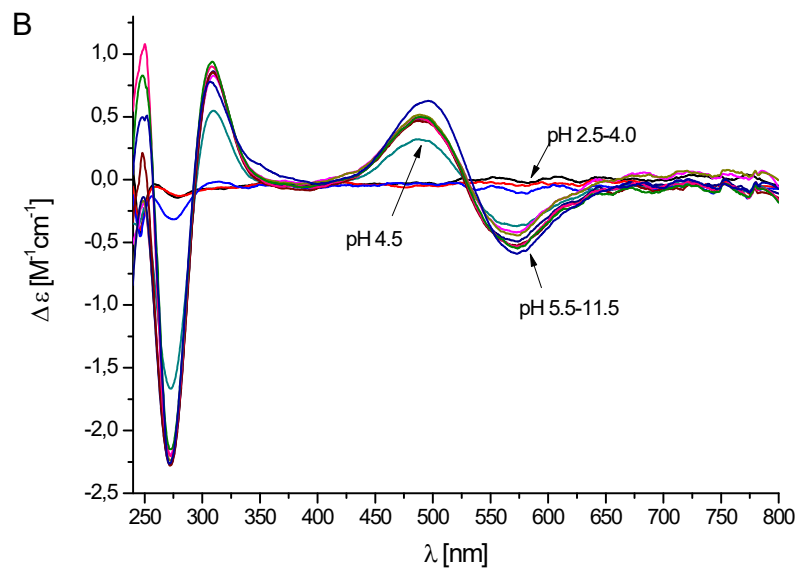



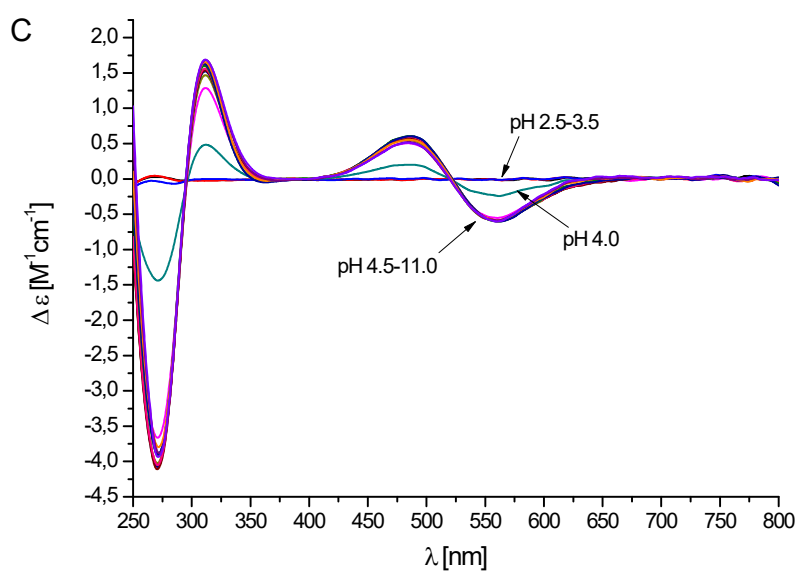

Fig. S4. CD spectra of Cu(II) complexes with: A) histatin 5; B) histatin 5-8; C) histatin 8, in pH range 2-11. Conditions:  $T = 298 \text{ K}$ ,  $I = 0.1 \text{ M NaClO}_4$ ,  $[\text{Cu(II)}] = 0.4 \cdot 10^{-3} \text{ M}$ ; M:L molar ratio = 0.8:1.

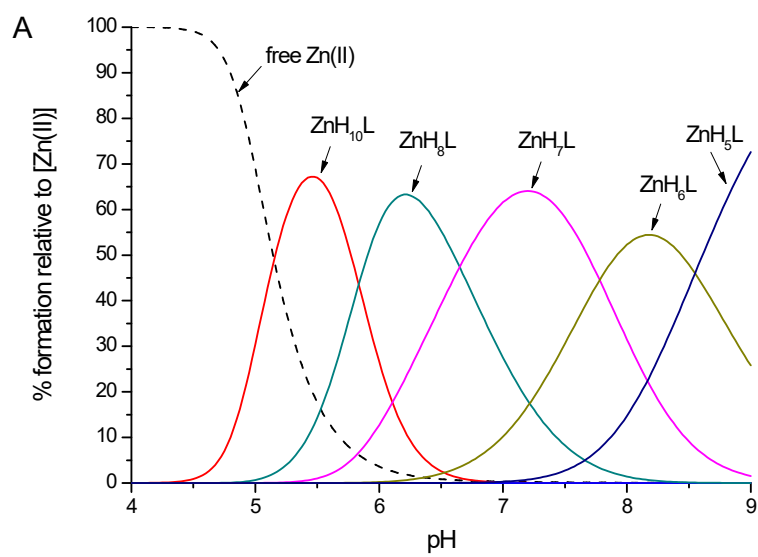

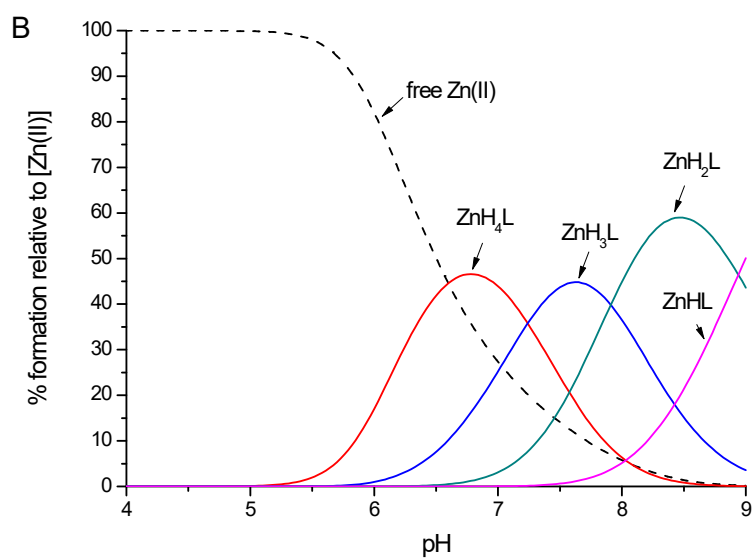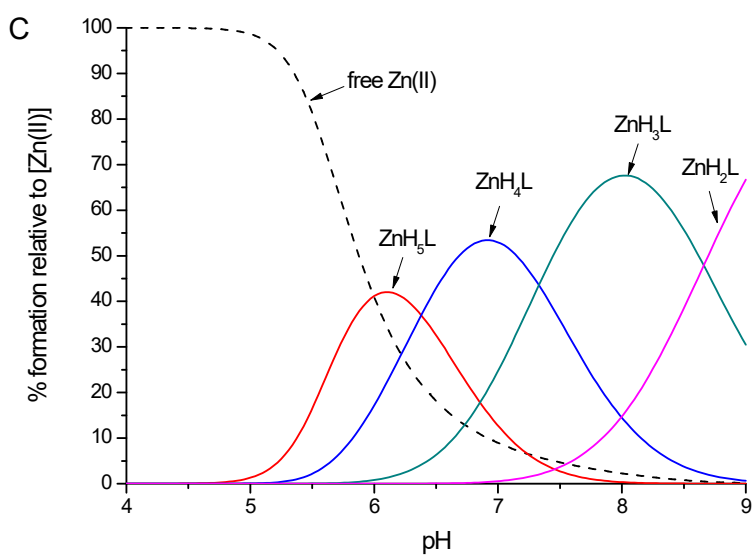

Fig. S5. Distribution diagrams for the formation of: A) Zn(II) complex with histatin 5; B) Zn(II) complex with histatin 5-8; C) Zn(II) complex with histatin 8. Conditions:  $T = 298\text{ K}$ ,  $I = 0.1\text{ M NaClO}_4$ ,  $[Zn(II)] = 0.4 \times 10^{-3}\text{ M}$ ; M:L molar ratio = 0.8:1.

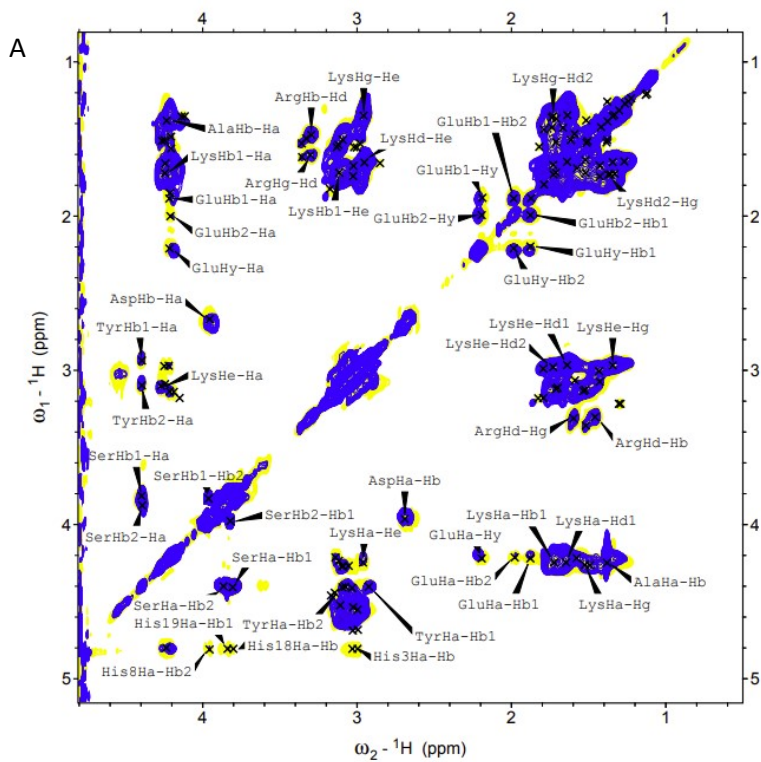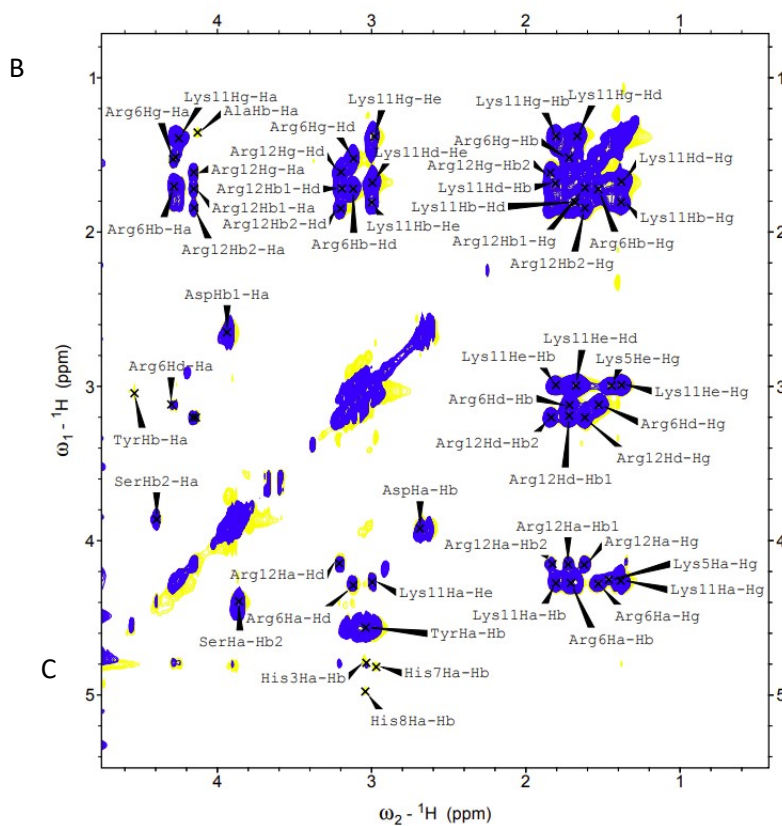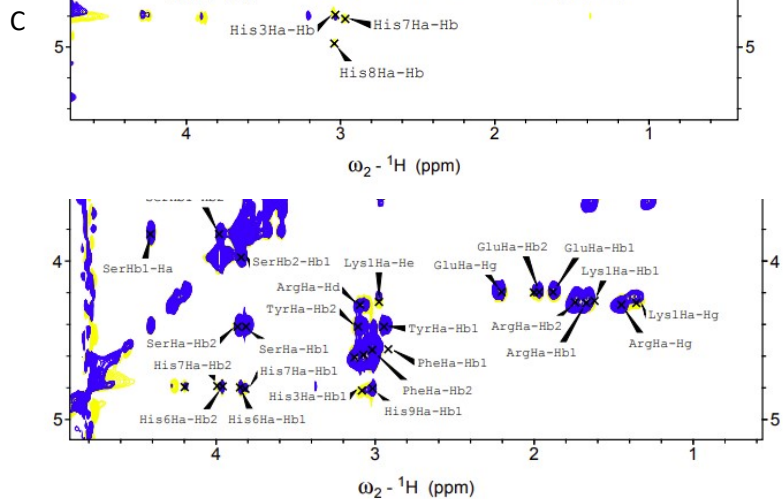

Fig S6.  $^1\text{H}$ - $^1\text{H}$  TOCSY NMR spectra of a fragment of the ligand (yellow) and the Zn(II) complex (blue) with the (A) histatin 5, (B) histatin 5-8 and (C) histatin 8. Conditions: [histatin 5] = [histatin 5-8] = [histatin 8] = 1 mM, [Zn(II)] = 1 mM, pH = 7.4,  $T = 298$  K.

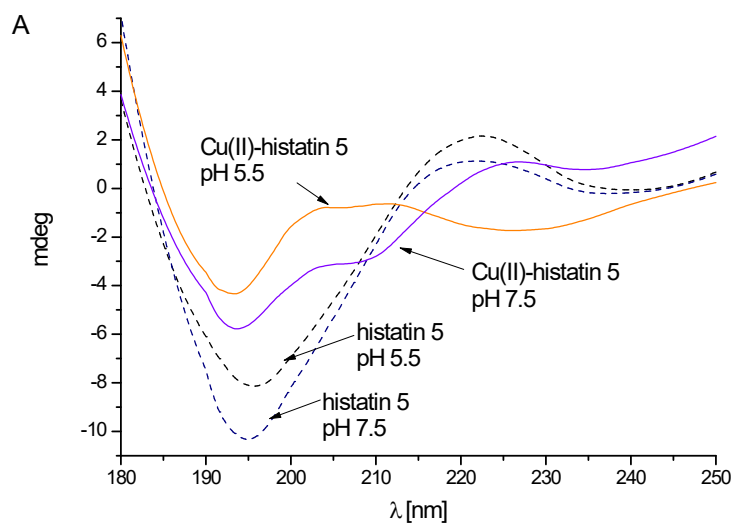

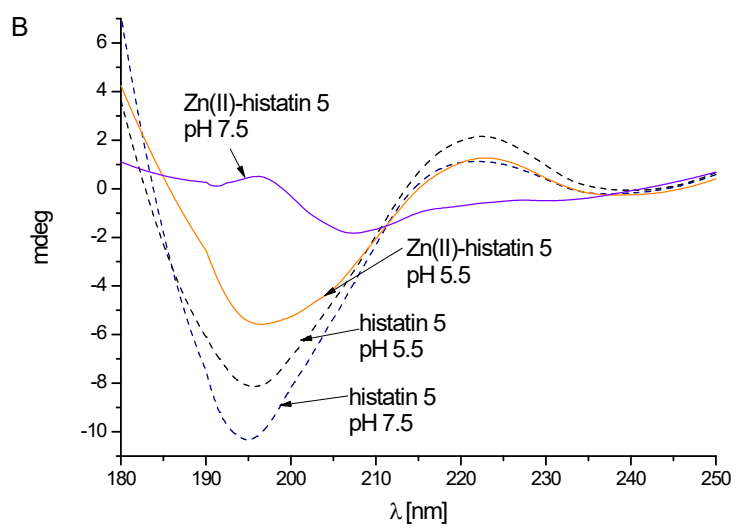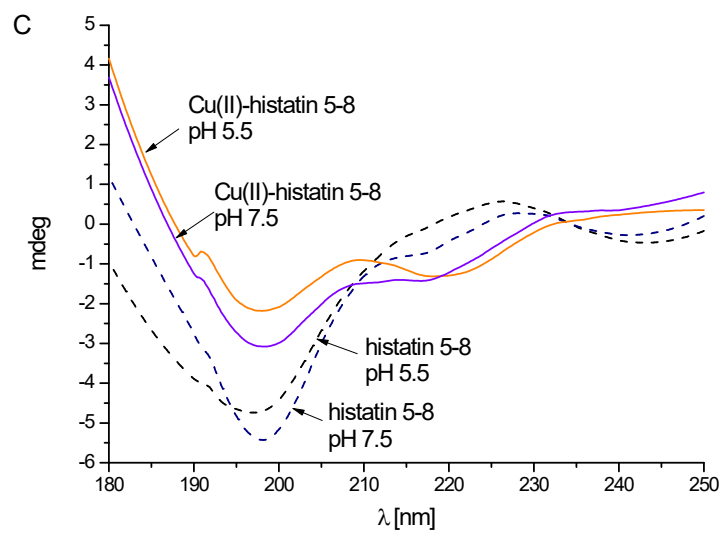

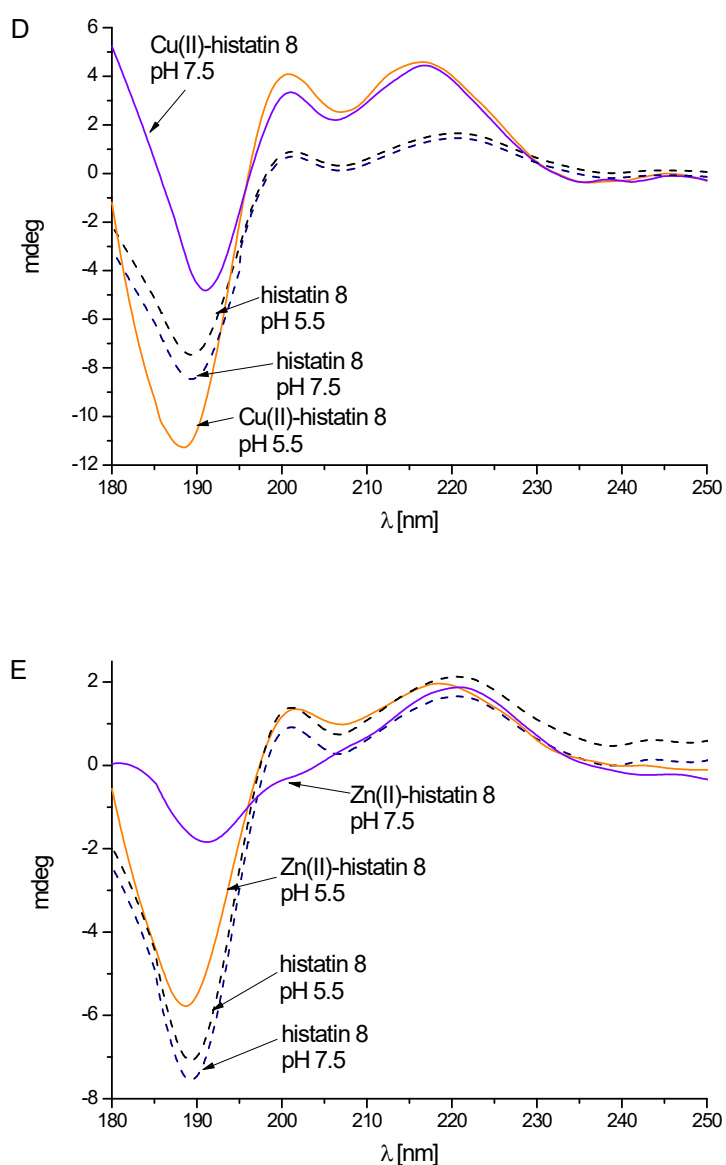

Fig. S7. Comparison of CD spectra of (A) histatin 5 and its Cu(II) complex, (B) histatin 5 and its Zn(II) complex, (C) histatin 5-8 and its Cu(II) complex, (D) histatin 8 and its Cu(II) complex and (E) histatin 8 and its Zn(II) complex at pH 5.5 and 7.5. Conditions: T = 298 K, I = 0.1 M NaClO<sub>4</sub>, [Cu(II)] = [Zn(II)] = 0.4·10<sup>-3</sup> M; M:L molar ratio = 0.8:1, optical path = 0.01 cm.

Table S2. Examples of MIC breakpoints values from EUCAST/2024/01/21 for bacteria.<sup>1</sup>

| <i>Enterococcus</i> spp.<br>(for <i>E. faecalis</i> ) | MIC breakpoints<br>(µg/mL) |    | Staphylococcus<br>spp.<br>(for <i>S. aureus</i> ) | MIC breakpoints<br>(µg/mL) |      |
|-------------------------------------------------------|----------------------------|----|---------------------------------------------------|----------------------------|------|
|                                                       | S≤                         | R> |                                                   | S≤                         | R>   |
| Ampicillin                                            | 4                          | 8  | Azithromycin                                      | 2                          | 2    |
| Ampicillin-<br>Sulbactam                              | 4                          | 8  | Ceftobiprole                                      | 2                          | 2    |
| Amoxicillin                                           | 4                          | 8  | Ciprofloxacin                                     | 0.001                      | 2    |
| Amoxicillin-<br>clavulanic acid                       | 4                          | 8  | Daptomycin                                        | 1                          | 1    |
| Imipenem                                              | 0.001                      | 4  | Moxifloxacin                                      | 0.25                       | 0.25 |

|                |    |    |             |      |      |
|----------------|----|----|-------------|------|------|
| Ciprofloxacin  | 4  | 4  | Amikacin    | 16   | 16   |
| Levofloxacin   | 4  | 4  | Gentamicin  | 2    | 2    |
| Vancomycin     | 4  | 4  | Tobramycin  | 2    | 2    |
| Linezolid      | 4  | 4  | Teicoplanin | 2    | 2    |
| Nitrofurantoin | 64 | 64 | Clindamycin | 0.25 | 0.25 |

**References:**

- 1 The European Committee on Antimicrobial Susceptibility Testing. Breakpoint tables for interpretation of MICs and zone diameters. Version 14.0, 2024. <http://www.eucast.org>.
